# Supplementary material for: Biomedical Applications and Bioavailability of Curcumin—An Updated Overview
Source: MDPI journal article supplement (doi:10.3390/pharmaceutics13122102), 2021-12-07
Supplement: s1 [file s1]

# Supplementary Materials: Biomedical Applications and Bioavailability of Curcumin—An Updated Overview

Soo-In Sohn, Arumugam Priya, Boopathi Balasubramaniam, Pandiyan Muthuramalingam, Chandran Sivasankar, Anthonyimuthu Selvaraj, Alaguvel Valliammai, Ravi Jothi and Subramani Pandian

**Table S1.** Molecular targets of Curcumin and its details.

| Target                                             | Common name      | Uniprot ID           | ChEMBL ID     | Target Class                 |
|----------------------------------------------------|------------------|----------------------|---------------|------------------------------|
| Monoamine oxidase A                                | MAOA             | P21397               | CHEMBL1951    | Oxidoreductase               |
| Beta amyloid A4 protein                            | APP              | P05067               | CHEMBL2487    | Membrane receptor            |
| Histone acetyltransferase p300                     | EP300            | Q09472               | CHEMBL3784    | Writer                       |
| Prostaglandin E synthase                           | PTGES            | O14684               | CHEMBL5658    | Enzyme                       |
| Toll-like receptor (TLR7/TLR9)                     | TLR9             | Q9NR96               | CHEMBL5804    | Toll-like and Il-1 receptors |
| Beta-secretase 1                                   | BACE1            | P56817               | CHEMBL4822    | Protease                     |
| DNA topoisomerase II alpha                         | TOP2A            | P11388               | CHEMBL1806    | Isomerase                    |
| Glyoxalase I                                       | GLO1             | Q04760               | CHEMBL2424    | Enzyme                       |
| Nuclear factor erythroid 2-related factor 2        | NFE2L2           | Q16236               | CHEMBL1075094 | Unclassified protein         |
| Arachidonate 5-lipoxygenase                        | ALOX5            | P09917               | CHEMBL215     | Oxidoreductase               |
| Cyclooxygenase-1                                   | PTGS1            | P23219               | CHEMBL221     | Oxidoreductase               |
| Inhibitor of NF-kappa-B kinase (IKK)               | IKBKG IKBKB CHUK | Q9Y6K9 O14920 O15111 | CHEMBL2111328 | Kinase                       |
| Epidermal growth factor receptor erbB1             | EGFR             | P00533               | CHEMBL203     | Kinase                       |
| Estradiol 17-beta-dehydrogenase 3                  | HSD17B3          | P37058               | CHEMBL4234    | Enzyme                       |
| Signal transducer and activator of transcription 3 | STAT3            | P40763               | CHEMBL4026    | Transcription factor         |
| 11-beta-hydroxysteroid dehydrogenase 1             | HSD11B1          | P28845               | CHEMBL4235    | Enzyme                       |
| Serine/threonine-protein kinase AKT                | AKT1             | P31749               | CHEMBL4282    | Kinase                       |
| Glycogen synthase kinase-3 beta                    | GSK3B            | P49841               | CHEMBL262     | Kinase                       |
| Carbonic anhydrase VII                             | CA7              | P43166               | CHEMBL        | Lyase                        |

|                                              |                  |                      |                   |                                     |
|----------------------------------------------|------------------|----------------------|-------------------|-------------------------------------|
|                                              |                  |                      | L2326             |                                     |
| Carbonic anhydrase VI                        | CA6              | P23280               | CHEMB<br>L3025    | Lyase                               |
| Carbonic anhydrase XII                       | CA12             | O43570               | CHEMB<br>L3242    | Lyase                               |
| Carbonic anhydrase XIV                       | CA14             | Q9ULX7               | CHEMB<br>L3510    | Lyase                               |
| Carbonic anhydrase IX                        | CA9              | Q16790               | CHEMB<br>L3594    | Lyase                               |
| Carbonic anhydrase VA                        | CA5A             | P35218               | CHEMB<br>L4789    | Lyase                               |
| Multidrug resistance-associated protein 1    | ABCC1            | P33527               | CHEMB<br>L3004    | Primary active transporter          |
| Serine/threonine-protein kinase Chk1         | CHEK1            | O14757               | CHEMB<br>L4630    | Kinase                              |
| Pyruvate dehydrogenase kinase isoform 1      | PDK1             | Q15118               | CHEMB<br>L4766    | Kinase                              |
| Serine/threonine-protein kinase WEE1         | WEE1             | P30291               | CHEMB<br>L5491    | Kinase                              |
| DNA topoisomerase I                          | TOP1             | P11387               | CHEMB<br>L1781    | Isomerase                           |
| Serine/threonine-protein kinase RAF          | RAF1             | P04049               | CHEMB<br>L1906    | Kinase                              |
| Serine/threonine-protein kinase B-raf        | BRAF             | P15056               | CHEMB<br>L5145    | Kinase                              |
| Carbonic anhydrase II                        | CA2              | P00918               | CHEMB<br>L205     | Lyase                               |
| Carbonic anhydrase I                         | CA1              | P00915               | CHEMB<br>L261     | Lyase                               |
| Glucagon receptor                            | GCGR             | P47871               | CHEMB<br>L1985    | Family B G protein-coupled receptor |
| Matrix metalloproteinase 14                  | MMP14            | P50281               | CHEMB<br>L3869    | Protease                            |
| Serine/threonine-protein kinase Aurora-B     | AURKB            | Q96GD4               | CHEMB<br>L2185    | Kinase                              |
| Plasminogen activator inhibitor-1            | SERPINE1         | P05121               | CHEMB<br>L3475    | Secreted protein                    |
| Ribosomal protein S6 kinase 1                | RPS6KB1          | P23443               | CHEMB<br>L4501    | Kinase                              |
| Serine/threonine-protein kinase Aurora-A     | AURKA            | O14965               | CHEMB<br>L4722    | Kinase                              |
| Cyclin-dependent kinase 2/cyclin A           | CDK2 CCNA1 CCNA2 | P24941 P78396 P20248 | CHEMB<br>L2094128 | Other cytosolic protein             |
| Tyrosinase                                   | TYR              | P14679               | CHEMB<br>L1973    | Oxidoreductase                      |
| Type-1 angiotensin II receptor (by homology) | AGTR1            | P30556               | CHEMB<br>L227     | Family A G protein-coupled receptor |
| NADPH oxidase 4                              | NOX4             | Q9NPH5               | CHEMB<br>L1250375 | Enzyme                              |
| Bone morphogenetic protein 1                 | BMP1             | P13497               | CHEMB<br>L3898    | Protease                            |

|                                                                         |             |               |                       |                                               |
|-------------------------------------------------------------------------|-------------|---------------|-----------------------|-----------------------------------------------|
| Matrix metalloproteinase 13                                             | MMP13       | P45452        | CHEMB<br>L280         | Protease                                      |
| ADAM17                                                                  | ADAM17      | P78536        | CHEMB<br>L3706        | Protease                                      |
| Elastase 1                                                              | CELA1       | Q9UNI1        | CHEMB<br>L3000        | Protease                                      |
| Prolyl endopeptidase                                                    | PREP        | P48147        | CHEMB<br>L3202        | Protease                                      |
| Glutamate receptor ionotropic kainate<br>1                              | GRIK1       | P39086        | CHEMB<br>L1918        | Ligand-gated ion<br>channel                   |
| Matrix metalloproteinase 8                                              | MMP8        | P22894        | CHEMB<br>L4588        | Protease                                      |
| Interleukin-8 receptor B                                                | CXCR2       | P25025        | CHEMB<br>L2434        | Family A G pro-<br>tein-coupled re-<br>ceptor |
| Alkaline phosphatase, tissue-<br>nonspecific isozyme                    | ALPL        | P05186        | CHEMB<br>L5979        | Enzyme                                        |
| Maternal embryonic leucine zipper<br>kinase                             | MELK        | Q14680        | CHEMB<br>L4578        | Kinase                                        |
| Inosine-5'-monophosphate dehydro-<br>genase 1                           | IMPDH1      | P20839        | CHEMB<br>L1822        | Oxidoreductase                                |
| Inosine-5'-monophosphate dehydro-<br>genase 2                           | IMPDH2      | P12268        | CHEMB<br>L2002        | Oxidoreductase                                |
| Complement factor D                                                     | CFD         | P00746        | CHEMB<br>L217677<br>1 | Protease                                      |
| Sphingosine kinase 2                                                    | SPHK2       | Q9NRA0        | CHEMB<br>L3023        | Enzyme                                        |
| Sphingosine kinase 1                                                    | SPHK1       | Q9NYA1        | CHEMB<br>L4394        | Enzyme                                        |
| Mitogen-activated protein kinase ki-<br>nase kinase 12                  | MAP3K12     | Q12852        | CHEMB<br>L190838<br>9 | Enzyme                                        |
| Apoptosis regulator Bcl-2                                               | BCL2        | P10415        | CHEMB<br>L4860        | Other ion channel                             |
| Thyroid hormone receptor alpha                                          | THRA        | P10827        | CHEMB<br>L1860        | Nuclear receptor                              |
| Thyroid hormone receptor beta-1                                         | THRB        | P10828        | CHEMB<br>L1947        | Nuclear receptor                              |
| Macrophage colony stimulating factor<br>receptor                        | CSF1R       | P07333        | CHEMB<br>L1844        | Kinase                                        |
| 5-lipoxygenase activating protein                                       | ALOX5AP     | P20292        | CHEMB<br>L4550        | Other cytosolic<br>protein                    |
| Histone deacetylase 3/Nuclear recep-<br>tor corepressor 2 (HDAC3/NCoR2) | NCOR2 HDAC3 | Q9Y618 O15379 | CHEMB<br>L211136<br>3 | Eraser                                        |
| Serine/threonine-protein kinase Sgk1                                    | SGK1        | O00141        | CHEMB<br>L2343        | Kinase                                        |
| Dipeptidyl peptidase IV                                                 | DPP4        | P27487        | CHEMB<br>L284         | Protease                                      |
| Dipeptidyl peptidase II                                                 | DPP7        | Q9UHL4        | CHEMB<br>L3976        | Protease                                      |
| Heat shock protein HSP 90-beta                                          | HSP90AB1    | P08238        | CHEMB<br>L4303        | Other cytosolic<br>protein                    |
| ADAM10                                                                  | ADAM10      | O14672        | CHEMB                 | Protease                                      |

|                                                                          |             |               |                       |                                     |
|--------------------------------------------------------------------------|-------------|---------------|-----------------------|-------------------------------------|
|                                                                          |             |               | L5028                 |                                     |
| Matrix metalloproteinase 3                                               | MMP3        | P08254        | CHEMB<br>L283         | Protease                            |
| Cyclin-dependent kinase 5/CDK5 activator 1                               | CDK5R1 CDK5 | Q15078 Q00535 | CHEMB<br>L190760<br>0 | Kinase                              |
| HERG                                                                     | KCNH2       | Q12809        | CHEMB<br>L240         | Voltage-gated ion channel           |
| 15-hydroxyprostaglandin dehydrogenase [NAD+]                             | HPGD        | P15428        | CHEMB<br>L129325<br>5 | Enzyme                              |
| Tyrosine-protein kinase JAK1                                             | JAK1        | P23458        | CHEMB<br>L2835        | Kinase                              |
| Tyrosine-protein kinase JAK2                                             | JAK2        | O60674        | CHEMB<br>L2971        | Kinase                              |
| Histone deacetylase 10                                                   | HDAC10      | Q969S8        | CHEMB<br>L5103        | Eraser                              |
| Matrix metalloproteinase 16                                              | MMP16       | P51512        | CHEMB<br>L2200        | Protease                            |
| Matrix metalloproteinase 12                                              | MMP12       | P39900        | CHEMB<br>L4393        | Protease                            |
| 14-3-3 protein gamma                                                     | YWHAG       | P61981        | CHEMB<br>L129329<br>6 | Unclassified protein                |
| Hepatic lipase                                                           | LIPC        | P11150        | CHEMB<br>L2127        | Enzyme                              |
| Endothelial lipase                                                       | LIPG        | Q9Y5X9        | CHEMB<br>L5080        | Hydrolase                           |
| WD repeat-containing protein 5                                           | WDR5        | P61964        | CHEMB<br>L107531<br>7 | Unclassified protein                |
| Serotonin 1a (5-HT1a) receptor                                           | HTR1A       | P08908        | CHEMB<br>L214         | Family A G protein-coupled receptor |
| Matrix metalloproteinase 9                                               | MMP9        | P14780        | CHEMB<br>L321         | Protease                            |
| Aminopeptidase N                                                         | ANPEP       | P15144        | CHEMB<br>L1907        | Protease                            |
| Glutamyl-peptide cyclotransferase                                        | QPCT        | Q16769        | CHEMB<br>L4508        | Enzyme                              |
| Carbonic anhydrase XIII                                                  | CA13        | Q8N1Q1        | CHEMB<br>L3912        | Lyase                               |
| Carbonic anhydrase VB                                                    | CA5B        | Q9Y2D0        | CHEMB<br>L3969        | Lyase                               |
| Matrix metalloproteinase 7                                               | MMP7        | P09237        | CHEMB<br>L4073        | Protease                            |
| Glutamate receptor ionotropic kainate 2                                  | GRIK2       | Q13002        | CHEMB<br>L3683        | Ligand-gated ion channel            |
| CMP-N-acetylneuraminate-beta-1,4-galactoside alpha-2,3-sialyltransferase | ST3GAL3     | Q11203        | CHEMB<br>L359607<br>6 | Transferase                         |
| Alpha-(1,3)-fucosyltransferase 7                                         | FUT7        | Q11130        | CHEMB<br>L359607<br>7 | Transferase                         |
| Fucosyltransferase 4                                                     | FUT4        | P22083        | CHEMB<br>L4996        | Enzyme                              |

|                                      |                                         |                                              |                       |                                               |
|--------------------------------------|-----------------------------------------|----------------------------------------------|-----------------------|-----------------------------------------------|
| Coagulation factor VII/tissue factor | F3 F7                                   | P13726 P08709                                | CHEMB<br>L209519<br>4 | Protease                                      |
| Metabotropic glutamate receptor 2    | GRM2                                    | Q14416                                       | CHEMB<br>L5137        | Family C G pro-<br>tein-coupled re-<br>ceptor |
| Purinergic receptor P2Y12            | P2RY12                                  | Q9H244                                       | CHEMB<br>L2001        | Family A G pro-<br>tein-coupled re-<br>ceptor |
| Gamma-secretase                      | PSEN2 PSENEN NCSTN<br>APH1A PSEN1 APH1B | P49810 Q9NZ42 Q92542<br>Q96BI3 P49768 Q8WW43 | CHEMB<br>L209413<br>5 | Protease                                      |
| Cyclooxygenase-2                     | PTGS2                                   | P35354                                       | CHEMB<br>L230         | Oxidoreductase                                |
| TNF-alpha                            | TNF                                     | P01375                                       | CHEMB<br>L1825        | Secreted protein                              |
